# Supplementary material for: Validation of a Genotype-Independent Hepatitis C Virus Near-Whole Genome Sequencing Assay
Source: MDPI journal article supplement (doi:10.3390/v13091721), 2021-08-30
Supplement: s1 [file s1]

## Supplemental Materials

Table S1. Primers used in the genotype-independent sequencing protocol. Primers were purified by standard desalting.

| STEP       | AMPLICON | NAME           | SEQUENCE (5' TO 3')                             | DIRECTION |
|------------|----------|----------------|-------------------------------------------------|-----------|
| RT         | WG       | oligo dA20     | AAAAAAAAAAAAAAAAAAAAA                           | Reverse   |
| RT         | WG       | Pr3            | GGCGGAATTCCTGGTCATAGCCTCCGTGAA                  | Reverse   |
| PCR        | WG       | 1abGENF1bp     | GGGTCGCGAAAGGCCTTGTGGTACTGCC                    | Forward   |
| PCR        | WG       | TIM-Pr3        | CAGGAAACAGCTATGACGGCGGAATTCCTGGTCATAGCCTCCGTGAA | Reverse   |
| NESTED PCR | WG       | 1abGENF2       | GTACTGCCTGATAGGGTGCTTGCGAGTGCC                  | Forward   |
| NESTED PCR | WG       | Pr6            | AATTCCTGGTCATAGCCTCCGTGAAGACTC                  | Reverse   |
| PCR        | MiDi     | Pr1            | TGGGGTTCGCGTATGATACCCGCTGCTTTGA                 | Forward   |
| PCR        | MiDi     | Pr2            | TGGGGTTTTCTTACGACACCAGGTGCTTTGA                 | Forward   |
| PCR        | MiDi     | oligo dA20-TIM | CAGGAAACAGCTATGACAAAAAAAAAAAAAAAAAAAAA          | Reverse   |
| NESTED PCR | MiDi     | Pr4            | CCGTATGATACCCGCTGCTTTGACTCAAC                   | Forward   |
| NESTED PCR | MiDi     | Pr5            | TCCTACGACACCAGGTGCTTTGATTCAAC                   | Forward   |
| NESTED PCR | MiDi     | TIM            | CAGGAAACAGCTATGAC                               | Reverse   |

Table S2. FDA guideline of Reference Strains for Reporting of Amino Acid Sequence Data.

| <b>GENOTYPE</b>    | <b>REFERENCE STRAIN</b> | <b>GENBANK ACCESSION ID</b> | <b>LENGTH (BP)</b> | <b>NUCLEOTIDE POSITIONS NS3-4A</b> | <b>NUCLEOTIDE POSITIONS NS5A</b> | <b>NUCLEOTIDE POSITIONS NS5B</b> |
|--------------------|-------------------------|-----------------------------|--------------------|------------------------------------|----------------------------------|----------------------------------|
| <b>GENOTYPE 1A</b> | H77                     | NC_004102                   | 9646               | 3420-5474                          | 6258-7601                        | 7602-9377                        |
| <b>GENOTYPE 1B</b> | Con1                    | AJ238799                    | 9030               | 3420-5474                          | 6258-7598                        | 7599-9374                        |
| <b>GENOTYPE 2</b>  | JFH-1                   | AB047639                    | 678                | 3431-5485                          | 6269-7666                        | 7667-9442                        |
| <b>GENOTYPE 3</b>  | S52                     | GU814263                    | 555                | 3436-5490                          | 6274-7629                        | 7630-9402                        |
| <b>GENOTYPE 4</b>  | ED43                    | GU814265                    | 497                | 3419-5473                          | 6257-7591                        | 7592-9364                        |
| <b>GENOTYPE 5</b>  | SA13                    | AF064490                    | 408                | 3328-5382                          | 6166-7515                        | 7516-9291                        |
| <b>GENOTYPE 6</b>  | EUHK2                   | Y12083                      | 340                | 3374-5428                          | 6212-7564                        | 7565-9340                        |

Table S3. HCV resistance-associated substitutions (RAS) in genotype 1a and 1b that were analyzed for accuracy. X indicates a variant with any mutation except the wildtype amino acid residue.

| NS3           | NS5a                         | NS5b  |
|---------------|------------------------------|-------|
| V36A/G/L/M/I  | M28T/V/A (GT1a only)         | L159F |
| T54A/C/G/S    | L28T/V/A (GT1b only)         | S282T |
| V55A/I        | Q30E/H/R/G/K/L/D (GT1a only) | L320F |
| Y56H          | R30E/H/G/K/L/D (GT1b only)   |       |
| Q80K/R        | L31M/V/F                     |       |
| V107I         | H58D (GT1a only)             |       |
| S122A/G/R     | Y93C/H/N/S (GT1a only)       |       |
| I132V         |                              |       |
| R155X         |                              |       |
| A156S/T/V/F/G |                              |       |
| V158I         |                              |       |
| D168X         |                              |       |
| I/V170A/F/T/V |                              |       |
| M175L         |                              |       |

Table S4. A summary of the mean number of sequence reads and wildtype amino acid counts for the two NS5B RAS within the overlapping region obtained by WG and MiDi amplicons: S282 and L320.

| NS5B CODON | Wildtype Amino Acid Residue | WG Amplicon            |                                           | MiDi Amplicon          |                                           |
|------------|-----------------------------|------------------------|-------------------------------------------|------------------------|-------------------------------------------|
|            |                             | Number of passed reads | Number of reads with wildtype residue (%) | Number of passed reads | Number of reads with wildtype residue (%) |
| <b>282</b> | S                           | 3588                   | 3559 (99.1)                               | 951                    | 945 (99.4)                                |
| <b>320</b> | L                           | 3899                   | 3876 (99.3)                               | 1401                   | 1394 (99.5)                               |

|                      |      | Genotype-Independent Method |        |        |        |        |     |       |    |    |    |    |   |   |   |   |    |
|----------------------|------|-----------------------------|--------|--------|--------|--------|-----|-------|----|----|----|----|---|---|---|---|----|
| GT1-Optimized Method | NS3  | A                           | C      | G      | T      | R      | Y   | W     | M  | K  | S  | B  | D | H | V | N |    |
|                      |      | A                           | 32,075 | 0      | 0      | 0      | 16  | 0     | 6  | 2  | 0  | 0  | 0 | 0 | 1 | 0 | 0  |
|                      |      | C                           | 0      | 48,835 | 0      | 0      | 0   | 47    | 0  | 3  | 0  | 1  | 0 | 0 | 0 | 0 | 0  |
|                      |      | G                           | 0      | 0      | 42,991 | 0      | 28  | 0     | 0  | 0  | 0  | 2  | 0 | 0 | 0 | 0 | 0  |
|                      |      | T                           | 0      | 0      | 0      | 31,319 | 0   | 38    | 1  | 0  | 2  | 0  | 0 | 0 | 0 | 0 | 0  |
|                      |      | R                           | 10     | 0      | 14     | 0      | 515 | 0     | 0  | 0  | 0  | 0  | 0 | 0 | 0 | 0 | 0  |
|                      |      | Y                           | 0      | 32     | 0      | 26     | 0   | 1,023 | 0  | 0  | 0  | 0  | 0 | 0 | 0 | 0 | 0  |
|                      |      | W                           | 4      | 0      | 0      | 1      | 0   | 0     | 41 | 0  | 0  | 0  | 0 | 0 | 0 | 0 | 0  |
|                      |      | M                           | 0      | 1      | 0      | 0      | 0   | 0     | 0  | 30 | 0  | 0  | 0 | 0 | 1 | 0 | 0  |
|                      |      | K                           | 0      | 0      | 1      | 1      | 0   | 0     | 0  | 0  | 22 | 0  | 0 | 0 | 0 | 0 | 0  |
|                      |      | S                           | 0      | 0      | 1      | 0      | 0   | 0     | 0  | 0  | 0  | 24 | 0 | 0 | 0 | 0 | 0  |
|                      |      | B                           | 0      | 0      | 0      | 0      | 0   | 0     | 0  | 0  | 0  | 0  | 1 | 0 | 0 | 0 | 0  |
|                      |      | D                           | 0      | 0      | 0      | 0      | 0   | 0     | 0  | 0  | 0  | 0  | 0 | 1 | 0 | 0 | 0  |
|                      |      | H                           | 0      | 0      | 0      | 0      | 0   | 0     | 0  | 0  | 0  | 0  | 0 | 0 | 2 | 0 | 0  |
|                      |      | V                           | 0      | 0      | 0      | 0      | 0   | 0     | 0  | 0  | 0  | 0  | 0 | 0 | 0 | 1 | 0  |
|                      |      | N                           | 0      | 0      | 0      | 0      | 0   | 0     | 0  | 0  | 0  | 0  | 0 | 0 | 0 | 0 | 0  |
| GT1-Optimized Method | NS5A | A                           | C      | G      | T      | R      | Y   | W     | M  | K  | S  | B  | D | H | V | N |    |
|                      |      | A                           | 22,411 | 0      | 0      | 0      | 21  | 0     | 1  | 0  | 0  | 0  | 0 | 0 | 0 | 0 | 0  |
|                      |      | C                           | 0      | 33,734 | 0      | 0      | 0   | 20    | 0  | 2  | 0  | 1  | 0 | 0 | 0 | 0 | 0  |
|                      |      | G                           | 0      | 0      | 32,285 | 0      | 16  | 0     | 0  | 0  | 2  | 0  | 0 | 0 | 0 | 0 | 0  |
|                      |      | T                           | 0      | 0      | 0      | 21,658 | 0   | 21    | 1  | 0  | 0  | 0  | 0 | 0 | 0 | 0 | 0  |
|                      |      | R                           | 18     | 0      | 13     | 0      | 521 | 0     | 0  | 0  | 0  | 0  | 0 | 0 | 0 | 0 | 0  |
|                      |      | Y                           | 0      | 19     | 0      | 23     | 0   | 617   | 0  | 0  | 0  | 0  | 0 | 0 | 0 | 0 | 0  |
|                      |      | W                           | 1      | 0      | 0      | 2      | 0   | 0     | 32 | 0  | 0  | 0  | 0 | 0 | 0 | 0 | 0  |
|                      |      | M                           | 2      | 1      | 0      | 0      | 0   | 0     | 0  | 52 | 0  | 0  | 0 | 0 | 0 | 0 | 0  |
|                      |      | K                           | 0      | 0      | 0      | 0      | 0   | 0     | 0  | 0  | 16 | 0  | 0 | 0 | 0 | 0 | 0  |
|                      |      | S                           | 0      | 1      | 0      | 0      | 0   | 0     | 0  | 0  | 0  | 26 | 0 | 0 | 0 | 0 | 0  |
|                      |      | B                           | 0      | 0      | 0      | 0      | 0   | 1     | 0  | 0  | 0  | 0  | 1 | 0 | 0 | 0 | 0  |
|                      |      | D                           | 0      | 0      | 0      | 0      | 0   | 0     | 0  | 0  | 0  | 0  | 0 | 1 | 0 | 0 | 0  |
|                      |      | H                           | 0      | 0      | 0      | 0      | 0   | 0     | 0  | 0  | 0  | 0  | 0 | 0 | 1 | 0 | 0  |
|                      |      | V                           | 0      | 0      | 0      | 0      | 0   | 0     | 0  | 0  | 0  | 0  | 0 | 0 | 0 | 1 | 0  |
|                      |      | N                           | 0      | 0      | 0      | 0      | 0   | 0     | 0  | 0  | 0  | 0  | 0 | 0 | 0 | 0 | 30 |
| GT1-Optimized Method | NS5B | A                           | C      | G      | T      | R      | Y   | W     | M  | K  | S  | B  | D | H | V | N |    |
|                      |      | A                           | 20,071 | 0      | 0      | 0      | 12  | 0     | 1  | 0  | 0  | 0  | 0 | 0 | 0 | 0 | 0  |
|                      |      | C                           | 0      | 23,254 | 0      | 0      | 0   | 14    | 0  | 0  | 0  | 0  | 0 | 0 | 0 | 0 | 0  |
|                      |      | G                           | 0      | 0      | 22,983 | 0      | 13  | 0     | 0  | 0  | 1  | 1  | 0 | 0 | 0 | 0 | 0  |
|                      |      | T                           | 0      | 0      | 0      | 16,665 | 0   | 13    | 0  | 0  | 0  | 0  | 0 | 0 | 0 | 0 | 0  |
|                      |      | R                           | 8      | 0      | 5      | 0      | 264 | 0     | 0  | 0  | 0  | 0  | 0 | 0 | 0 | 0 | 0  |
|                      |      | Y                           | 0      | 10     | 0      | 5      | 0   | 380   | 0  | 0  | 0  | 0  | 0 | 0 | 0 | 0 | 0  |
|                      |      | W                           | 0      | 0      | 0      | 1      | 0   | 0     | 9  | 0  | 0  | 0  | 0 | 0 | 0 | 0 | 0  |
|                      |      | M                           | 0      | 0      | 0      | 0      | 0   | 0     | 0  | 16 | 0  | 0  | 0 | 0 | 0 | 0 | 0  |
|                      |      | K                           | 0      | 0      | 0      | 0      | 0   | 0     | 0  | 0  | 8  | 0  | 0 | 0 | 0 | 0 | 0  |
|                      |      | S                           | 0      | 0      | 0      | 0      | 0   | 0     | 0  | 0  | 0  | 11 | 0 | 0 | 0 | 0 | 0  |
|                      |      | B                           | 0      | 0      | 0      | 0      | 0   | 0     | 0  | 0  | 0  | 0  | 0 | 0 | 0 | 0 | 0  |
|                      |      | D                           | 0      | 0      | 0      | 0      | 0   | 0     | 0  | 0  | 0  | 0  | 0 | 0 | 0 | 0 | 0  |
|                      |      | H                           | 0      | 0      | 0      | 0      | 0   | 0     | 0  | 0  | 0  | 0  | 0 | 0 | 2 | 0 | 0  |
|                      |      | V                           | 0      | 0      | 0      | 0      | 0   | 0     | 0  | 0  | 0  | 0  | 0 | 0 | 0 | 0 | 0  |
|                      |      | N                           | 0      | 0      | 0      | 0      | 0   | 0     | 0  | 0  | 0  | 0  | 0 | 0 | 0 | 0 | 0  |

**Figure S1.** Accuracy nucleotide concordance between GT1-optimized and the genotype-independent sequencing assays. Matrices depicting nucleotide concordance between sequences collected by two different amplification and sequencing methods. Concordant nucleotide calls across methods/replicates are highlighted in green. Partially discordant nucleotides resulting from differences in mixture calling (i.e. one method detected a mixture, while the other detected a component thereof) are highlighted in yellow.

Genotype-Independent Method  
Replicate 1

|      |      |        |        |        |        |     |     |    |    |    |    |   |   |   |   |    |
|------|------|--------|--------|--------|--------|-----|-----|----|----|----|----|---|---|---|---|----|
| NS3  |      | A      | C      | G      | T      | R   | Y   | W  | M  | K  | S  | B | D | H | V | N  |
|      | A    | 30,198 | 0      | 0      | 0      | 24  | 0   | 1  | 0  | 0  | 0  | 0 | 0 | 0 | 0 | 0  |
|      | C    | 0      | 45,770 | 0      | 0      | 0   | 71  | 0  | 11 | 0  | 1  | 0 | 0 | 0 | 0 | 0  |
|      | G    | 0      | 0      | 40,303 | 0      | 48  | 0   | 0  | 0  | 1  | 15 | 0 | 0 | 0 | 0 | 0  |
|      | T    | 0      | 0      | 0      | 29,461 | 0   | 46  | 3  | 0  | 2  | 0  | 0 | 0 | 0 | 0 | 0  |
|      | R    | 57     | 0      | 68     | 0      | 404 | 0   | 0  | 0  | 0  | 0  | 0 | 0 | 0 | 0 | 0  |
|      | Y    | 0      | 146    | 0      | 98     | 0   | 790 | 0  | 1  | 0  | 0  | 0 | 0 | 0 | 0 | 0  |
|      | W    | 8      | 0      | 0      | 3      | 0   | 0   | 30 | 1  | 0  | 0  | 0 | 0 | 0 | 0 | 0  |
|      | M    | 4      | 6      | 0      | 0      | 0   | 0   | 0  | 25 | 0  | 0  | 0 | 0 | 1 | 0 | 0  |
|      | K    | 0      | 0      | 5      | 3      | 0   | 0   | 0  | 0  | 15 | 0  | 0 | 0 | 0 | 0 | 0  |
|      | S    | 0      | 3      | 5      | 0      | 0   | 0   | 0  | 0  | 0  | 19 | 0 | 0 | 0 | 0 | 0  |
|      | B    | 0      | 0      | 0      | 0      | 0   | 0   | 0  | 1  | 0  | 0  | 0 | 0 | 0 | 0 | 0  |
|      | D    | 0      | 0      | 0      | 0      | 0   | 0   | 0  | 0  | 0  | 0  | 0 | 1 | 0 | 0 | 0  |
|      | H    | 0      | 1      | 0      | 0      | 0   | 0   | 0  | 0  | 0  | 0  | 0 | 0 | 3 | 0 | 0  |
|      | V    | 0      | 0      | 0      | 0      | 0   | 0   | 0  | 0  | 0  | 0  | 0 | 0 | 0 | 1 | 0  |
|      | N    | 0      | 0      | 0      | 0      | 0   | 0   | 0  | 0  | 0  | 0  | 0 | 0 | 0 | 0 | 0  |
|      | NS5A |        | A      | C      | G      | T   | R   | Y  | W  | M  | K  | S | B | D | H | V  |
| A    |      | 20,249 | 0      | 0      | 0      | 28  | 0   | 0  | 2  | 0  | 0  | 0 | 0 | 0 | 0 | 0  |
| C    |      | 0      | 30,472 | 0      | 1      | 0   | 28  | 0  | 1  | 0  | 2  | 0 | 0 | 0 | 0 | 0  |
| G    |      | 0      | 0      | 29,135 | 0      | 28  | 0   | 0  | 0  | 3  | 2  | 0 | 0 | 0 | 0 | 0  |
| T    |      | 0      | 0      | 0      | 19,548 | 0   | 34  | 4  | 0  | 2  | 0  | 0 | 0 | 0 | 0 | 0  |
| R    |      | 50     | 0      | 44     | 0      | 414 | 0   | 0  | 0  | 0  | 0  | 0 | 0 | 0 | 0 | 0  |
| Y    |      | 0      | 62     | 0      | 45     | 0   | 491 | 0  | 0  | 0  | 0  | 1 | 0 | 0 | 0 | 0  |
| W    |      | 0      | 0      | 0      | 5      | 0   | 0   | 24 | 0  | 0  | 0  | 0 | 0 | 0 | 0 | 0  |
| M    |      | 7      | 6      | 0      | 0      | 0   | 0   | 0  | 37 | 0  | 0  | 0 | 0 | 0 | 0 | 0  |
| K    |      | 0      | 0      | 2      | 1      | 0   | 0   | 0  | 0  | 11 | 0  | 0 | 0 | 0 | 0 | 0  |
| S    |      | 0      | 1      | 5      | 0      | 0   | 0   | 0  | 0  | 0  | 21 | 0 | 0 | 0 | 0 | 0  |
| B    |      | 0      | 0      | 0      | 0      | 0   | 0   | 0  | 0  | 0  | 0  | 1 | 0 | 0 | 0 | 0  |
| D    |      | 0      | 0      | 0      | 0      | 0   | 0   | 0  | 0  | 0  | 0  | 0 | 1 | 0 | 0 | 0  |
| H    |      | 0      | 0      | 0      | 0      | 0   | 0   | 0  | 0  | 0  | 0  | 0 | 0 | 1 | 0 | 0  |
| V    |      | 0      | 0      | 0      | 0      | 0   | 0   | 0  | 1  | 0  | 0  | 0 | 0 | 0 | 0 | 0  |
| N    |      | 0      | 0      | 0      | 0      | 0   | 0   | 0  | 0  | 0  | 0  | 0 | 0 | 0 | 0 | 30 |
| NS5B |      |        | A      | C      | G      | T   | R   | Y  | W  | M  | K  | S | B | D | H | V  |
|      | A    | 17,663 | 0      | 1      | 0      | 24  | 0   | 0  | 5  | 0  | 0  | 0 | 0 | 0 | 0 | 1  |
|      | C    | 1      | 20,425 | 0      | 1      | 0   | 32  | 0  | 0  | 0  | 0  | 0 | 0 | 0 | 0 | 5  |
|      | G    | 2      | 0      | 20,200 | 0      | 17  | 0   | 0  | 0  | 1  | 0  | 0 | 0 | 0 | 0 | 4  |
|      | T    | 0      | 0      | 0      | 14,633 | 0   | 18  | 2  | 0  | 0  | 0  | 0 | 0 | 0 | 0 | 2  |
|      | R    | 25     | 0      | 22     | 0      | 193 | 0   | 0  | 0  | 0  | 0  | 0 | 0 | 0 | 0 | 1  |
|      | Y    | 0      | 34     | 0      | 38     | 0   | 270 | 0  | 0  | 0  | 0  | 0 | 0 | 0 | 0 | 0  |
|      | W    | 0      | 0      | 0      | 1      | 0   | 0   | 6  | 0  | 0  | 0  | 0 | 0 | 0 | 0 | 0  |
|      | M    | 1      | 2      | 0      | 0      | 0   | 0   | 0  | 10 | 0  | 0  | 0 | 0 | 0 | 0 | 0  |
|      | K    | 0      | 0      | 2      | 0      | 0   | 0   | 0  | 0  | 5  | 0  | 0 | 0 | 0 | 0 | 0  |
|      | S    | 0      | 0      | 2      | 0      | 0   | 0   | 0  | 0  | 0  | 7  | 0 | 0 | 0 | 0 | 0  |
|      | B    | 0      | 0      | 0      | 0      | 0   | 0   | 0  | 0  | 0  | 0  | 0 | 0 | 0 | 0 | 0  |
|      | D    | 0      | 0      | 0      | 0      | 0   | 0   | 0  | 0  | 0  | 0  | 0 | 0 | 0 | 0 | 0  |
|      | H    | 0      | 0      | 0      | 0      | 0   | 0   | 0  | 0  | 0  | 0  | 0 | 0 | 1 | 0 | 0  |
|      | V    | 0      | 0      | 0      | 0      | 0   | 0   | 0  | 0  | 0  | 0  | 0 | 0 | 0 | 0 | 0  |
|      | N    | 0      | 0      | 0      | 0      | 0   | 0   | 0  | 0  | 0  | 0  | 0 | 0 | 0 | 0 | 0  |

**Figure S2.** Nucleotide concordance between accuracy replicates (N=93 samples). Matrices depicting nucleotide concordance between sequences collected by two replicates of the genotype-independent method. Concordant nucleotide calls across methods/replicates are highlighted in green. Partially discordant nucleotides resulting from differences in mixture calling (i.e. one method detected a mixture, while the other detected a component thereof) are highlighted in yellow. Completely discordant basecalls are highlighted in red.

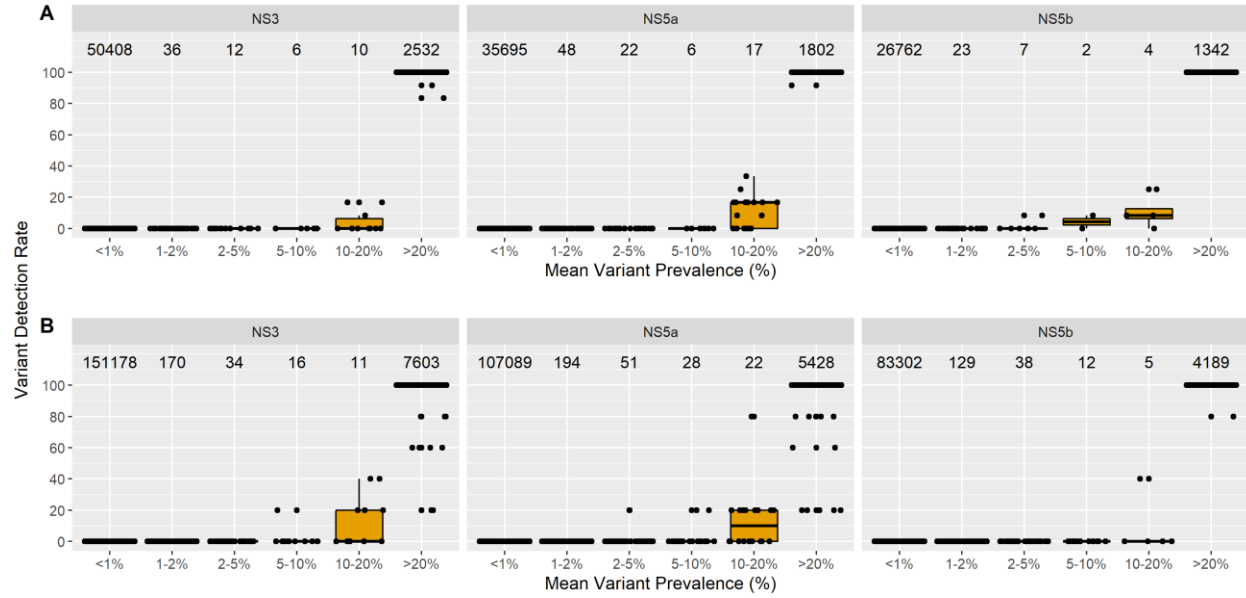

**Figure S3.** Repeatability and Reproducibility of amino acid substitution detection amino acid substitutions. Substitutions observed at a prevalence  $\geq 20\%$  in a given replicate were considered “detected.” Variant detection rate (defined as the % of replicates per sample, in which a substitution was detected) is categorized by expected substitution prevalence (defined as the mean prevalence of a substitution across all replicates of a sample). Replicate testing of each sample began from the same RNA extract; all steps beginning from the RT-PCR were repeated. Numbers indicated in red represent the total number of substitutions in each bin. (A) Repeatability of amino acid substitutions was determined using four samples (3 GT1a, 1 GT1b) in 12 replicates processed on a single separate MiSeq run. (B) Reproducibility of amino acid substitutions was determined using 12 samples (10 GT1a, 1 GT1b, 1 GT3) in 5 replicates processed on separate days on five separate MiSeq runs.
